# Supplementary material
Source: PubMed Central journal article supplement (PMC11028613)
Supplement: 262_2011_1156_MOESM1_ESM.pdf [file 262_2011_1156_MOESM1_ESM.pdf]

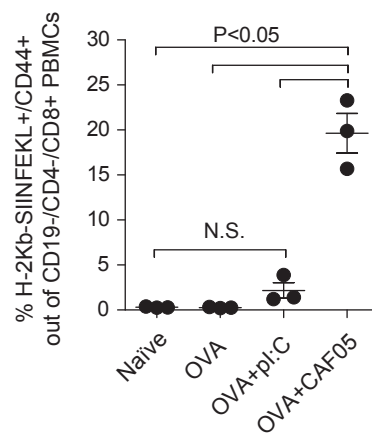

**Supplementary Fig. 1** Adjuvant effect of CAF05 is superior to soluble poly(I:C). Mice were vaccinated three times and blood was sampled 16 days after the third vaccine. Graph shows frequency of H-2Kb-SIINFEKL pentamer+/CD44+ cells out of CD19-/CD4-/CD8+ PBMCs, N=3, P value is ANOVA w/ Tukey's post test

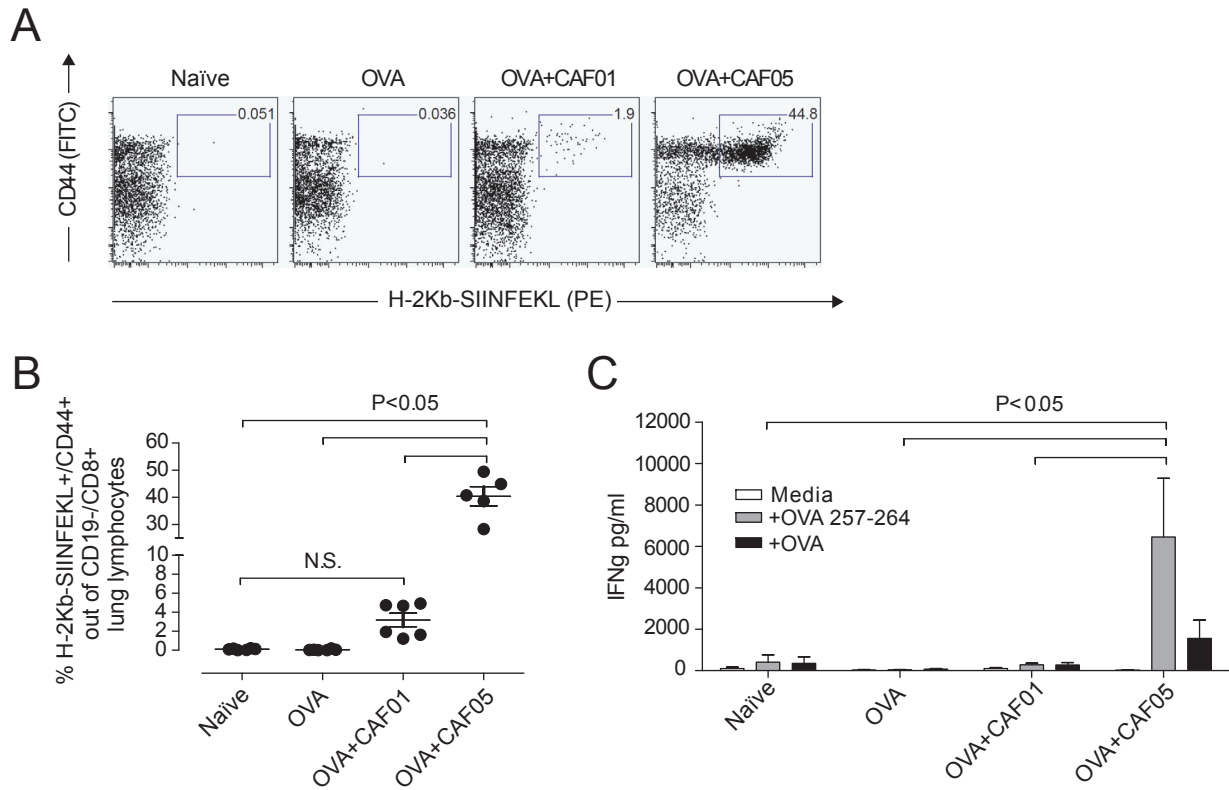

**Supplementary Fig. 2** Prophylactic vaccine-induced immune response at the tumor site (lung). Mice were vaccinated i.p. three times at two week intervals and given an i.v. challenge with B16-OVA tumor cells two weeks after the 3rd vaccine. A) Representative dotplot of H-2Kb-SIINFEKL pentamer+/CD44+ out of CD19-/CD4-/CD8+ lymphocytes in lungs 16 days after tumor challenge. B) Individual data of pentamer positive cells in lungs 16 days after tumor challenge, P= ANOVA w/ Tukey's post test, N=5-6. C) IFN- $\gamma$  in supernatants 72h after ex-vivo restimulation of lung-lymphocytes with minimal epitope OVA<sub>257-264</sub> (SIINFEKL), OVA protein or media w/o antigen measured by ELISA. \* P<.05 vs. naïve, ANOVA w/ Tukey's multiple comparison post. Data is representative of two experiments

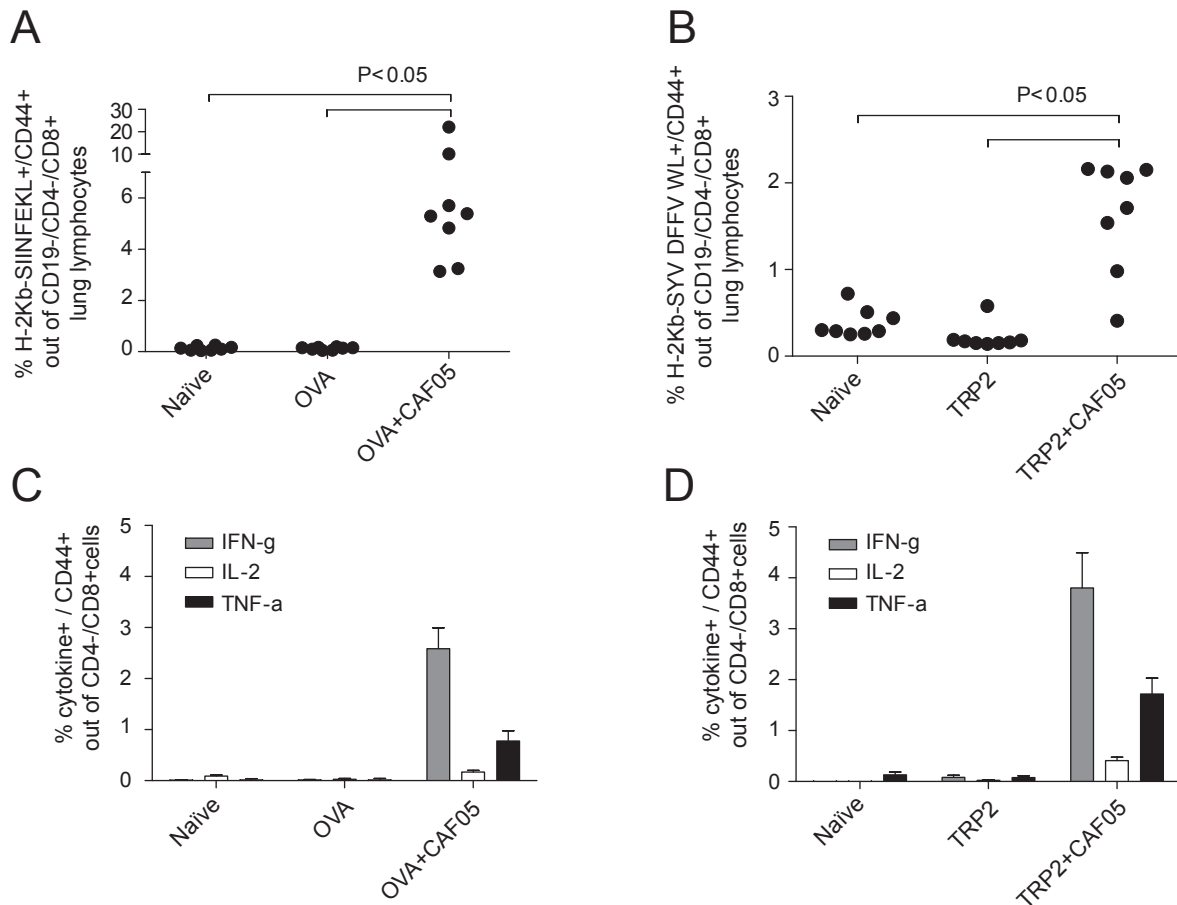

**Supplementary Fig. 3** Therapeutic vaccine induced immune response at the tumor site (lung). Mice received an i.v. challenge with  $5 \times 10^5$  B16-OVA cells and were vaccinated i.p. with OVA or TRP2 based vaccines at day 2, 6 and 10 relative to the day of challenge. Lungs were perfused and analysed on day 16 for antigen specific CTL's by flow cytometry. A) Frequency of H-2Kb-SIINFEKL pentamer+/CD44+ out of CD19-/CD4-/CD8+ lung lymphocytes, N= 8, P value is ANOVA w/ Tukey's post test. B) Frequency of H-2Kb- SYVDFFVWL pentamer+/CD44+ out of CD19-/CD4-/CD8+ lung lymphocytes, N= 8, P value is ANOVA w/ Tukey's post test. C) Cytokine production of lung CD8+ T cells from Naïve, OVA and OVA+CAF05 vaccinated mice restimulated ex-vivo with minimal epitope OVA<sub>257-264</sub> (SIINFEKL). D) Cytokine production of lung CD8+ T cells from Naïve, TRP2 and TRP2+CAF05 vaccinated mice restimulated ex-vivo with minimal epitope TRP2<sub>180-188</sub> (SYVD-FFVWL). N=8, \* P<0.05 vs. same cytokine in Naïve mice, ANOVA w/ Tukey's post test
